# Supplementary material
Source: ML conference proceedings conference paper supplement (https://openreview.net/forum?id=RNVwm4BzXO)
Supplement: supplementary_material [file attachment]

---

# Towards Consistent Video Editing with Text-to-Image Diffusion Models ——NeurIPS 2023 Supplementary Material

---

Zicheng Zhang<sup>1\*</sup> Bonan Li<sup>1\*</sup> Xuecheng Nie<sup>2</sup> Congying Han<sup>1†</sup> Tiande Guo<sup>1</sup> Luoqi Liu<sup>2</sup>

<sup>1</sup>University of Chinese Academy of Sciences <sup>2</sup>MT Lab, Meitu Inc.

## Contents

|                                                                              |          |
|------------------------------------------------------------------------------|----------|
| <b>A Details of Theoretic Analysis and Proof</b>                             | <b>1</b> |
| A.1 Definitions and notations                                                | 1        |
| A.2 Distribution transition in Transformer Module                            | 2        |
| A.3 Covariate shift for tuning $W_q$                                         | 3        |
| A.4 Covariate shift for appending Temporal Attention Module                  | 4        |
| A.5 Covariate shift for appending Shift-restricted Temporal Attention Module | 4        |
| <b>B More Results</b>                                                        | <b>4</b> |
| B.1 Position for inserting Temporal Attention Module                         | 5        |
| B.2 More qualitative results                                                 | 5        |

## A Details of Theoretic Analysis and Proof

In this section, we illustrate the details of analysis and proof. For clarity, Some symbols may differ slightly from the paper.

### A.1 Definitions and notations

**Attention mechanism.** Given a spatial-temporal feature  $z \in \mathbb{R}^{b \times n \times l_1 \times d_1}$ , and textual embedding  $c \in \mathbb{R}^{b \times n \times l_2 \times d_2}$ , where  $b, n, l, d$  denote the lengths of batch, frame, sequence and feature dimensions, the attention mechanism obtains three elements Query  $Q$ , Key  $K$  and Value  $V$  by  $Q = zW_q$ ,  $K = cW_k$ ,  $V = cW_v$ , where  $W_q \in \mathbb{R}^{d_1 \times d}$ ,  $W_k$  and  $W_v \in \mathbb{R}^{d_2 \times d}$ . After that, they will interact to generate the transferred feature via

$$\text{Attention}(z, c) = M_{Q,K}V, \text{ where } M_{Q,K} = \text{softmax}(QK^T / \sqrt{d}). \quad (1)$$

**Layer Normalization.** Considering data  $x \in \mathbb{R}^{l \times d}$ , the *Layer Norm* [1] is defined as

$$\text{Norm}(x) = \alpha \frac{x - \mu_x}{\sigma_x} + \beta, \text{ where } \mu_x = \frac{1}{ld} \sum_{i,j=1}^{l,d} x^{i,j}, \sigma_x = \sqrt{\frac{1}{ld} \sum_{i,j=1}^{l,d} (x^{i,j} - \mu_x)^2}, \quad (2)$$

where  $\alpha$  and  $\beta$  are learnable scalar parameters.

---

\*Equal contribution

†Corresponding author

**Remark 1.** In practice, there is an alternative definition of Layer Norm, where  $\mu_x$  and  $\sigma_x$  are computed only along feature dimension, e.g.,  $\mu_x = \frac{1}{d} \sum_{j=1}^d x^{[j]}$ . Both the two definitions are appropriate for the subsequent analysis.

**Transformer module.** A classical Transformer module in LDM [4] has the residual structure:

$$\text{Transformer}(z, c) = z + \text{Linear}(\text{Attention}(\text{norm}(z), \text{norm}(c))), \quad (3)$$

where  $\text{Linear}(z) = zW_L + b_L$ ,  $W_L$  and  $b_L$  are learnable parameters.

**Remark 2.** In LDM [4], the Self Attention (SA) Module is defined by

$$\text{Transformer}(z) = z + \text{Linear}(\text{Attention}(\text{norm}(z), \text{norm}(z))), \quad (4)$$

and the Cross Attention (CA) Module is defined by

$$\text{Transformer}(z, c) = z + \text{Linear}(\text{Attention}(\text{norm}(z), c)), \quad (5)$$

We generalize and unify them into a common form in Eq. (3) for the sake of analysis.

## A.2 Distribution transition in Transformer Module

**Proposition 1.** We assume that for Transformers in Eq. (3), any input feature  $z \in \mathbb{R}^{l \times d}$  (or  $\mathbb{R}^{n \times d}$ ) is a sample of i.i.d  $d$ -dimensional Gaussian random variables, denoted as  $rv(z) \sim N(\mu_{rv(z)}, \Sigma_{rv(z)})$ , and  $\hat{z} = \text{Norm}(z)$ , same notation for  $c$ . (i) For the output from Eq. (1), the  $i$ -th row vector variable,  $\text{Attention}(\hat{z}, \hat{c})^i$ , follows the Gaussian distribution  $N(\mu_{rv(V)}, \omega_{Q,K} \Sigma_{rv(V)})$ , where  $\mu_{rv(V)} = W_v^T \mu_{rv(\hat{c})}$ ,  $\Sigma_{rv(V)} = W_v^T \Sigma_{rv(\hat{c})} W_v$ , and  $\omega_{Q,K} = \|M_{Q,K}^i\|_2^2$ . (ii) For the output from Eq. (3), each row vector variable in  $\text{Transformer}(z, c)$  follows the Gaussian distribution  $N(\mu'_{rv(z)}, \Sigma'_{rv(z)})$ , where  $\mu'_{rv(z)} = \mu_{rv(z)} + W_L^T \mu_{rv(V)} + b_L$ , and  $\Sigma'_{rv(z)} = \Sigma_{rv(z)} + \omega_{Q,K} W_L^T \Sigma_{rv(V)} W_L$ .

*Proof.* The proof can be obtained directly by using the property of Gaussian distribution:

Under the assumption,  $z$  can viewed as the sample from  $[rv(z)_1^T; \dots; rv(z)_l^T]$ , where  $rv(z)_i, i = 1, \dots, l$  are i.i.d and follow  $N(\mu_{rv(z)}, \Sigma_{rv(z)})$ . Given the affine mapping in Eq. (2), it is intuitive that the random variable  $rv(\hat{z}) = \alpha \frac{rv(z) - \mu_z}{\sigma_z} + \beta$  follows Gaussian distribution, hence  $\hat{z}$  can be viewed as sample from  $[rv(\hat{z})_1^T; \dots; rv(\hat{z})_l^T]$ . Similar conclusion can be obtained for  $c$ , thus each row vector in  $V$  of Eq. (1) follows the Gaussian distribution, where the random variable

$$rv(V) = W_v^T rv(\hat{c}) \sim N(W_v^T \mu_{rv(\hat{c})}, W_v^T \Sigma_{rv(\hat{c})} W_v). \quad (6)$$

(i) Considering that the  $i$ -th row vector from Eq. (1),

$$A^i := \text{Attention}(\hat{z}, \hat{c})^i = \sum_{j=1}^l M_{Q,K}^{i,j} (\hat{c} W_v)^j. \quad (7)$$

According to the additive property of Gaussian distribution, the random variable

$$\begin{aligned} rv(A^i) &= \sum_{j=1}^l M_{Q,K}^{i,j} rv(V)_j \sim N(\mu_{rv(V)}, \omega_{Q,K} \Sigma_{rv(V)}), \\ \text{where } \omega_{Q,K} &= \sum_{j=1}^l (M_{Q,K}^{i,j})^2 = \|M_{Q,K}^i\|_2^2. \end{aligned} \quad (8)$$

(ii) For each  $i = 1, \dots, l$ , we have

$$\text{Transformer}(z, c)^i = z^i + \text{Attention}(\hat{z}, \hat{c})^i W_L + b_L, \quad (9)$$

Therefore, we can derive the random variable

$$\begin{aligned} rv(z) + W_L^T rv(A^i) + b_L &\sim \\ N(\mu_{rv(z)} + W_L^T \mu_{rv(V)} + b_L, \Sigma_{rv(z)} + \omega_{Q,K} W_L^T \Sigma_{rv(V)} W_L). \end{aligned} \quad (10)$$

□

### A.3 Covariate shift for tuning $W_q$

Since *Tune-A-Video* solely tunes the parameters of Transformers including  $W_q$  in SCA and CA, which inherited from pre-trained LDM, to prevent covariate shift,  $\mu'_{rv(z)}$  and  $\Sigma'_{rv(z)}$  should not be largely changed before and after tuning. At first, we can observe that  $\mu'_{rv(z)}$  is unrelated to  $W_q$ , hence tuning  $W_q$  does not affect the mean value. For  $\Sigma'_{rv(z)}$ , we can conclude that tuning  $W_q$  has little impact on it through the following theoretic analysis.

**Lemma 1.** *Given that  $x \in \mathbb{R}^n$ , the softmax function is defined by*

$$\text{softmax}(x) = \frac{1}{\sum_{j=1}^n \exp(\lambda x_j)} \begin{bmatrix} \exp(\lambda x_1) \\ \vdots \\ \exp(\lambda x_n) \end{bmatrix}, \lambda > 0. \quad (11)$$

*The softmax function is  $L$ -Lipschitz with respect to  $\|\cdot\|_2$  with  $L = \lambda$ , that is, for all  $z, z' \in \mathbb{R}^n$ ,*

$$\|\text{softmax}(x) - \text{softmax}(x')\|_2 \leq \lambda \|x - x'\|_2.$$

Please refer to Proposition 4 in [2] for the proof.

**Proposition 2.** *Along with notations in Proposition 1, denoting the tuned results of  $W_q$  as  $W_q^{tuning}$ , and the tuned Covariance of  $\Sigma'_{rv(z)}$  as  $\Sigma_{rv(z)}^{tuning}$ , we have*

$$\|\Sigma_{rv(z)}^{tuning} - \Sigma'_{rv(z)}\| \leq \alpha \|W_q^{tuning} - W_q\|_2, \quad (12)$$

*where  $\alpha$  is a constant related to the definition of matrix norm but unrelated to the tuning process.*

*Proof.* First, we expand the formula

$$\begin{aligned} \|\Sigma_{rv(z)}^{tuning} - \Sigma'_{rv(z)}\| &= \|\omega_{Q^{tuning}, K} W_L^T \Sigma_{rv(V)} W_L - \omega_{Q, K} W_L^T \Sigma_{rv(V)} W_L\| \\ &= |\omega_{Q^{tuning}, K} - \omega_{Q, K}| \|W_L^T \Sigma_{rv(V)} W_L\|. \end{aligned} \quad (13)$$

In the following, we consider the first term and have

$$\begin{aligned} |\omega_{Q^{tuning}, K} - \omega_{Q, K}| &= \left| \|M_{Q^{tuning}, K}^i\|_2^2 - \|M_{Q, K}^i\|_2^2 \right| \\ &= |(M_{Q^{tuning}, K}^i - M_{Q, K}^i)^T (M_{Q^{tuning}, K}^i + M_{Q, K}^i)| \\ &\leq \|M_{Q^{tuning}, K}^i - M_{Q, K}^i\|_2 \|M_{Q^{tuning}, K}^i + M_{Q, K}^i\|_2 \\ &\leq 2 \|M_{Q^{tuning}, K}^i - M_{Q, K}^i\|_2 \\ &= 2 \|\text{softmax}(Q_{tuning}^i K^T / \sqrt{d}) - \text{softmax}(Q^i K^T / \sqrt{d})\|_2. \end{aligned} \quad (14)$$

By Lemma 1, softmax is a Lipschitz function under 2-norm, thus we have

$$\begin{aligned} |\omega_{Q^{tuning}, K} - \omega_{Q, K}| &\leq \frac{2}{\sqrt{d}} \left\| \frac{Q_{tuning}^i K^T}{\sqrt{d}} - \frac{Q^i K^T}{\sqrt{d}} \right\|_2 \\ &\leq \frac{2}{d} \|Q_{tuning}^i - Q^i\|_2 \|K\|_2 \\ &= \frac{2}{d} \|\hat{z}^i W_q^{tuning} - \hat{z}^i W_q\|_2 \|K\|_2 \\ &= \frac{2}{d} \|W_q^{tuning} - W_q\|_2 \|\hat{z}^i\|_2 \|K\|_2. \end{aligned} \quad (15)$$

In summary, we can derive

$$\|\Sigma_{rv(z)}^{tuning} - \Sigma'_{rv(z)}\| \leq \frac{2}{d} \|W_q^{tuning} - W_q\|_2 \|\hat{z}^i\|_2 \|K\|_2 \|W_L^T \Sigma_{rv(V)} W_L\|. \quad (16)$$

□

**Remark 3.** *Because  $W_q^{tuning}$  is optimized iteratively from  $W_q$ , which is well initialized from pre-trained LDM to have a small gradient value under the diffusion loss, and*

$$\|W_q^{tuning} - W_q\|_2^2 < \text{Trace}((W_q^{tuning} - W_q)(W_q^{tuning} - W_q)^T) = \|W_q^{tuning} - W_q\|_F^2, \quad (17)$$

*it is intuitive that under a small learning rate, this term will have a small value.*

#### A.4 Covariate shift for appending Temporal Attention Module

For a batch of temporal data  $z \in \mathbb{R}^{(bl) \times n \times d}$ , Temporal Attention (TA) Module has the following form

$$\text{Transformer}(z) = z + \text{Linear}(\text{Attention}(\text{norm}(z), \text{norm}(z))). \quad (18)$$

Considering a temporal feature  $z \in \mathbb{R}^{n \times d}$ , following Proposition 1 the impact on mean value  $\mu'_{rv(z)} - \mu_{rv(z)} = W_L^T W_v^T \mu_{rv(\hat{z})} + b_L$ , and the impact on covariance  $\Sigma'_{rv(z)} - \Sigma_{rv(z)} = \omega_{Q,K} W_L^T \Sigma_{rv(V)} W_L$ .

#### A.5 Covariate shift for appending Shift-restricted Temporal Attention Module

For a batch of temporal data  $z \in \mathbb{R}^{(bl) \times n \times d}$ , STAM has the following form

$$\text{Transformer}(z) = z + \text{Linear}(\text{Attention}(IC(z), IC(z))). \quad (19)$$

Considering a sample  $z \in \mathbb{R}^{n \times d}$ , the impact on mean value  $\mu'_{rv(z)} - \mu_{rv(z)} = W_L^T W_v^T \mu_{rv(\hat{z})} + b_L$ , and the impact on covariance  $\Sigma'_{rv(z)} - \Sigma_{rv(z)} = \omega_{Q,K} W_L^T \Sigma_{rv(V)} W_L$ . However, due to  $\mu_{rv(\hat{z})} = 0$ , we have  $\mu'_{rv(z)} - \mu_{rv(z)} = b_L$ . The covariance shift is illustrated by the following proposition.

**Proposition 3.** Along with notations in Proposition 1, given  $\Sigma'_{rv(z)} = \Sigma_{rv(z)} + \omega_{Q,K} W_L^T \Sigma_{rv(V)} W_L$ , we have

$$\|\Sigma'_{rv(z)} - \Sigma_{rv(z)}\| \leq \|W_L\|^2 \|W_v\|^2 \|\Sigma_{rv(\hat{z})}\|. \quad (20)$$

*Proof.* Since  $\sum_{j=1} M_{Q,K}^{i,j} = 1$ , and  $M_{Q,K}^{i,j} \geq 0$ , we can derive  $0 \leq \omega_{Q,K} \leq 1$ . Thus

$$\begin{aligned} \|\Sigma'_{rv(z)} - \Sigma_{rv(z)}\| &= \|\omega_{Q,K} W_L^T \Sigma_{rv(V)} W_L\| \\ &\leq \|W_L^T \Sigma_{rv(V)} W_L\| \\ &\leq \|W_L\|^2 \|\Sigma_{rv(V)}\| \\ &\leq \|W_L\|^2 \|W_v\|^2 \|\Sigma_{rv(\hat{z})}\|. \end{aligned} \quad (21)$$

□

In STAM, since  $\Sigma_{rv(\hat{z})} = \Sigma_{rv(z)}$ ,  $\|W_L\| = 1$  and  $\|W_v\| = 1$ , thus the proposition shows that  $\|\Sigma'_{rv(z)} - \Sigma_{rv(z)}\| \leq \|\Sigma_{rv(z)}\|$ . By experiments, the most variances are small values around  $1e-2$ , hence STAM indeed alleviates the covariate shift compared with TA Module.

## B More Results

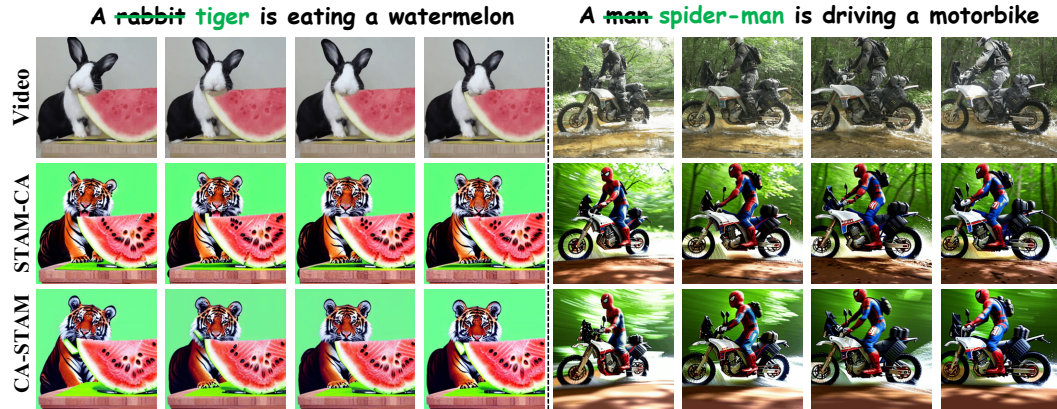

Figure 1: Inserting STAM before (STAM-CA) or after (CA-STAM) CA Module. The examples show that different orders have subtle visual effects on the results.

### B.1 Position for inserting Temporal Attention Module

We note that *Tune-A-Video* appends *TA* Module after *CA* Module, where the module sequence is *SCA* Module—*CA* Module—*TA* Module. Our  $EI^2$  inserts *STAM* before *CA* Module, where the module sequence is *FFAM*—*STAM*—*CA* Module. This sequence is more suitable for the theoretical analysis of *STAM*. In practice, the sequence *FFAM*—*CA* Module—*STAM* for inflating LDM also performs well in experiments, and we do not observe an obvious visual advantage from reordering the module sequence. Figure 1 depicts a few examples.

### B.2 More qualitative results

For comprehensive analysis and evaluation, we have supplied a video in the supplementary materials, which contains the *Qualitative Comparison*, *Ablation Study* and *Combination of  $EI^2$  and P2P* [3]. It can be observed that *STAM* and *FFAM* facilitate  $EI^2$  to surpass previous state-of-the-art methods in terms of textual alignment and temporal consistency. Incorporating *P2P* [3] with  $EI^2$  can further improve the stability and structure preservation of results.

## References

- [1] Ba, J., Kiros, J.R., Hinton, G.E.: Layer normalization. arXiv preprint arXiv: 1607.06450 (2016)
- [2] Gao, B., Pavel, L.: On the properties of the softmax function with application in game theory and reinforcement learning. ArXiv **abs/1704.00805** (2017)
- [3] Hertz, A., Mokady, R., Tenenbaum, J., Aberman, K., Pritch, Y., Cohen-Or, D.: Prompt-to-prompt image editing with cross attention control. arXiv preprint arXiv: 2208.01626 (2022)
- [4] Rombach, R., Blattmann, A., Lorenz, D., Esser, P., Ommer, B.: High-resolution image synthesis with latent diffusion models. In: CVPR (2022)
